# Supplementary material for: Next Generation MUT-MAP, a High-Sensitivity High-Throughput Microfluidics Chip-Based Mutation Analysis Panel
Source: PLoS One. 2014 Mar 21;9(3):e90761. doi: 10.1371/journal.pone.0090761 (PMC3962342; doi:10.1371/journal.pone.0090761)
Supplement: Table S1 — The preamplification primer sequences for the new MUT-MAP content: oncogenes PIK3CA , HRAS , FGFR3 , FLT3 , KIT and MET . (XLSX) [file pone.0090761.s002.xlsx]

## Sheet: preamp primers
	Table S1. Preamplification Primer Sequences.
	Preamplification Primer Sets for 11-Gene Panel
	Gene		Primer	Sequence
	PIK3CA	Exon 1	PKE1_PRE_FWD1	TACCCCCTCCATCAACTTCTTCAA
			PKE1_PRE_REV1	TTACTTTTAAAAAGGGTTGAAAAAGCCGAA
		Exon 4	PKE4_PRE_FWD1	GTGCACTCAGAATAAAAATTCTTTGTGCA
			PKE4_PRE_REV1	CTAACCATCTGAAAACATACTACAGGTC
		Exon 7	PKE7_PRE_FWD1	TTTAGATATTCCCATTATTATAGAGATGATTGT
			PKE7_PRE_REV1	GTGTAATCAAACAAGTTTATATTTCCCCA
		Exon 9	PKE9_PRE_FWD1	GACAAAGAACAGCTCAAAGCAATTTCTA
			PKE9_PRE_REV1	CAATAGGTATGGTAAAAACATGCTGAGA
		Exon 20	PKE20_PRE_FWD1	TAAAACTGAGCAAGAGGCTTTGGAGTA
			PKE20_PRE_REV1	CTTTCATTTTCTCAGTTATCTTTTCAGTTCAA
		Exon 3	PKE3_PRE_REV1	CACTTTTAAAATATACTTGCCCTGATATTCTAA
			PKE3_PRE_FWD1	CAAATAATAGTGGTGATCTGGGTAATAGT
	HRAS	Exon 2	HR2_PRE_FWD1	TGAGGAGCGATGACGGAATATAAGC
			HR2_PRE_REV1	GGCGGCGCCAGGCTC
		Exon 3	HR3_PRE_FWD1	GGAGACGTGCCTGTTGGACATC
			HR3_PRE_REV1	AGCCTCACGGGGTTCACCTGTACT
	FGFR3	Exon 6	FGFR3 ex6 F3	CCTGAGCGTCATCTGCCCCCACA
			FGFR3_e6_RC01	CGCCGTCTGGTTGGCCGGCA
		Exon 8	F8_PRE_FWD1	CCGAGGAGGAGCTGGTGGA
			F8_PRE_REV1	GGGAGCCCAGGCCTT
		Exon 13	FGFR3_e13_FC01	GCCCGCAATGTGCTGGTGA
			F13_PRE_REV1	TGTTGGCGCCAGGCGTCCTACT
		Exon 15	F15_PRE_FWD1	GGTCCTGCTCTGGGAGATCTTCA
			F15_PRE_REV1	AGGGATGCCACTCACAGGTCGT
	FLT3	Exon 20	FLT_PRE_FWD1	TGTGTTCACAGAGACCTGGCC
			FLT_PRE_REV1	AAATAAGTAGGAAATAGCAGCCTCACAT
	KIT	Exon 11	K11_PRE_FWD1	CTATTTTTCCCTTTCTCCCCACAGAA
			K11_PRE_REV1	CCAAAACTCAGCCTGTTTCTGGGA
		Exon 13	K13_PRE_FWD1	GCTTGGACACGGCTTTACCTCCA
			K13_PRE_REV1	CGAGTGCCCATTTGACAGAACG
		Exon 17	K17_PRE_FWD1	CTCCTCCAACCTAATAGTGTATTCACAGA
			K17_PRE_REV1	CAGAGAATGGGTACTCACGTTTCCTT
	MET	Exon 2	M2_PRE_FWD2	GTGCATTCCCTATCAAATATGTCAACGA
			M2_RC01	AGCAGTGCTCATGATTGGGTC
		Exon 14	M14_PRE_FWD3	ACACTCCTCATTTGGATAGGCTTGTA
			M14_RC01	GAACAATAAACTGAAATATACCTTCTGGAAAAGT
		Exon 19	M19_PRE_REV1	CACATCTGACTTGGTGGTAAACTTTTGA
			M19_PRE_FWD1	GATGAAAAATTCACAGTCAAGGTTGCT
